# Supplementary material for: Dysregulation of extracellular vesicle protein cargo in female myalgic encephalomyelitis/chronic fatigue syndrome cases and sedentary controls in response to maximal exercise
Source: PubMed Central journal article supplement — J Extracell Vesicles. 2024 Jan 3;13(1):12403. doi: 10.1002/jev2.12403 (PMC10764978; doi:10.1002/jev2.12403), 2024-01-03
Supplement: JEV2-13-12403-s004.pdf [file JEV2-13-12403-s004.pdf]

# Dysregulation of extracellular vesicle protein cargo in female ME/CFS cases and sedentary controls in response to maximal exercise

# Ludovic Giloteaux, # Katherine A. Glass, Arnaud Germain, Sheng Zhang, Maureen R. Hanson

## Supplementary Figures:

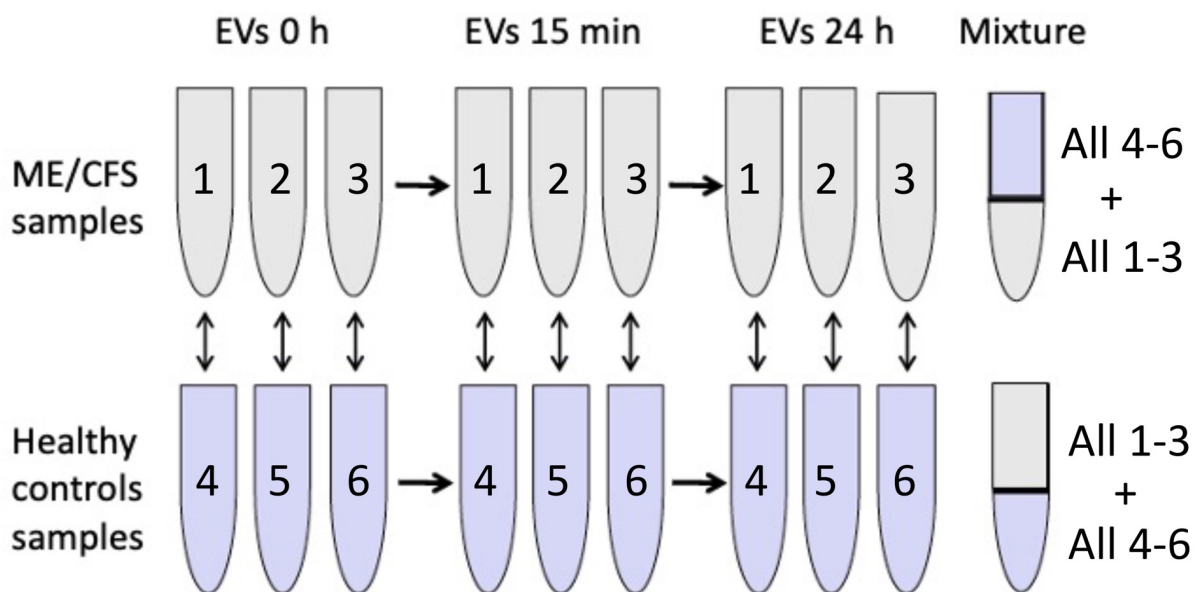

**Supplementary Figure S1: TMT10-plex analysis strategy.** 1, 2, and 3 represent three different ME/CFS subjects. 4, 5, and 6 represent three different healthy control samples.

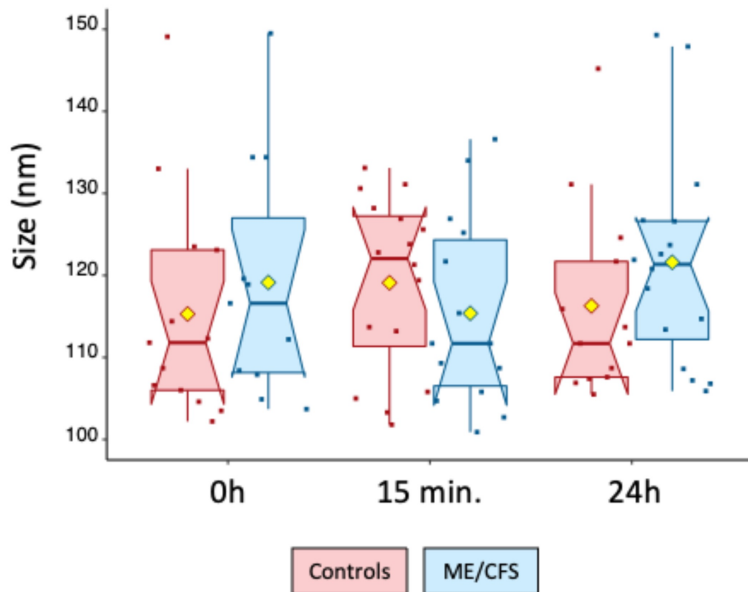

**Supplementary Figure S2: Nanoparticle Tracking Analysis.** Size of vesicles in nm in ME/CFS subjects and healthy controls. The yellow dot represents the mean. The non-parametric Wilcoxon signed-rank test was used to test the significance of differences ( $p < 0.05$ ) between cases and controls. There were no significant differences.

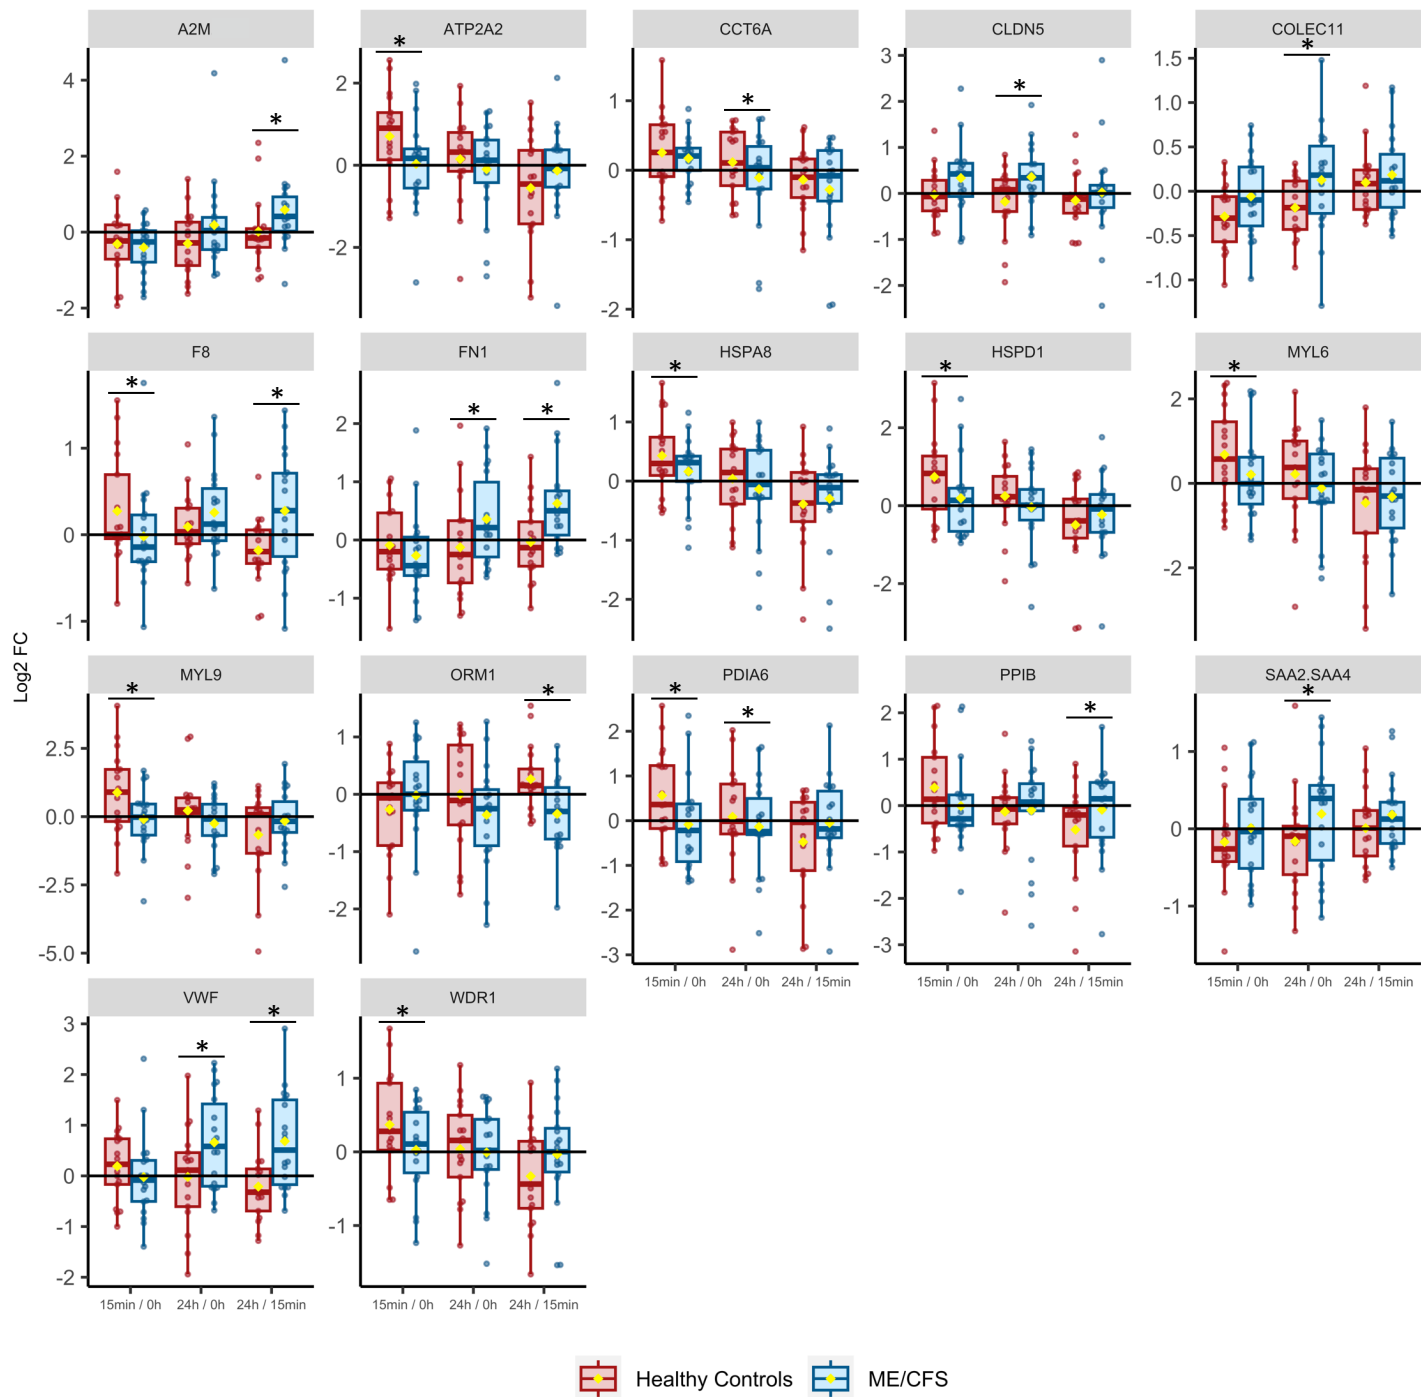

**Supplementary Figure S3: Within-subject fold changes over time for proteins changing differently post-exercise in ME/CFS patients vs. controls.** \* shows significance between ME/CFS and control groups in the bootstrapping analysis (red dots in Figure 8), where a protein is significant if the FDR-adjusted confidence intervals for the median Log<sub>2</sub>FC of 10,000 bootstrapped datasets do not include 0 ( $q < 0.1$ ). The yellow dot represents the mean.
